# Supplementary material for: Epidemiological Study on Salmonella Prevalence in Sow Herds Using Direct and Indirect Detection Methods
Source: MDPI journal article supplement (doi:10.3390/microorganisms10081532), 2022-07-28
Supplement: s1 [file s1]

**Table S1.** Number of serovars found in the sub-units on the farms A, B, and C.

| Serovar                          | Farm                                          |        |          |
|----------------------------------|-----------------------------------------------|--------|----------|
|                                  | A                                             | B      | C        |
|                                  | (Gilts Integration/Peripartal/Piglet Rearing) |        |          |
| <i>S. Typhimurium</i>            | 12/0/1                                        | 0/0/6  | -        |
| <i>S. Typhimurium monophasic</i> | 1/0/107                                       | 0/0/62 | 0/0/1    |
| <i>S. Derby</i>                  | 5/0/0                                         | 2/3/0  | 49/20/2  |
| <i>S. Goldcoast</i>              | 0/0/11                                        | -      | -        |
| <i>S. Stanley</i>                | 1/0/1                                         | -      | -        |
| <i>S. subspecies I</i>           | 0/0/2                                         | -      | -        |
| <i>S. rough mutant*</i>          | 0/0/1                                         | -      | -        |
| <i>S. London</i>                 | -                                             | 1/0/0  | -        |
| <i>S. Infantis</i>               | -                                             | -      | 0/0/9    |
| Total number per farm            | 19/0/123                                      | 3/3/68 | 49/20/12 |

“-“ not applicable; \* Mutant of *S. Typhimurium* with altered lipopolysaccharide O-antigen.

**Table S2.** Distribution of frequencies using McNemar test (grey) and Kappa statistic values (black) showing agreement between the boot swabs, feces, and blood sampling methods for *Salmonella* detection for gilt integration excluding results of time points 4 and 6 of farm A due to vaccination.

|                                 |           | Kappa     |         |      |
|---------------------------------|-----------|-----------|---------|------|
|                                 |           | Boot swab | Feces   | OD15 |
| <i>p</i> -value<br>McNemar test | Boot swab |           | -0.19   | 0.51 |
|                                 | Feces     | <0.0001   |         | 0.64 |
|                                 | OD15      | 0.0017    | <0.0001 |      |
|                                 | OD40      | <0.0001   | <0.0001 | -    |

“-“ not applicable
